# Supplementary material for: The wolf reference genome sequence (Canis lupus lupus) and its implications for Canis spp. population genomics
Source: PubMed Central journal article supplement (PMC5492679; doi:10.1186/s12864-017-3883-3), 2017-06-29
Supplement: 12864_2017_3883_MOESM1_ESM.pdf [file 12864_2017_3883_MOESM1_ESM.pdf]

## SUPPLEMENTARY MATERIAL

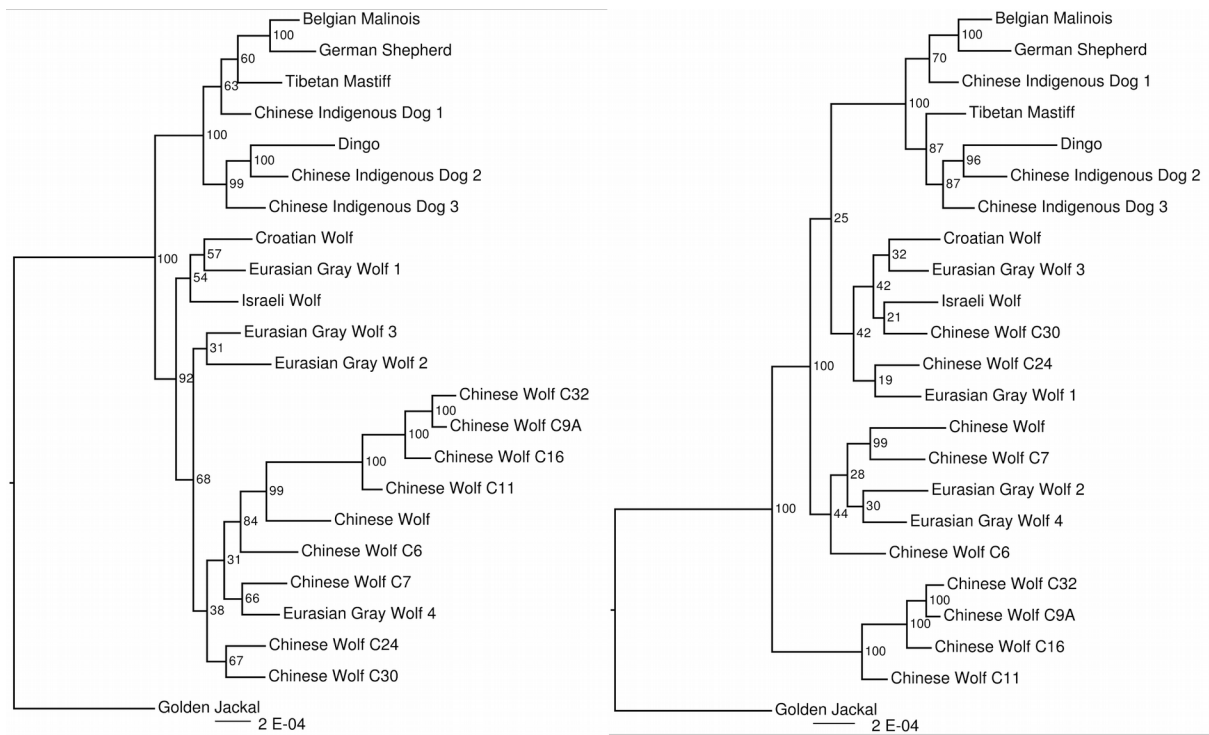

**Supplementary Figure 1:** Phylogenies. The left panel shows the phylogenetic tree of all the samples, estimated from reads that are mapped to the boxer dog reference genome, while the right panel shows the phylogenetic tree estimated from the data after mapping reads to the de novo assembled wolf reference genome.

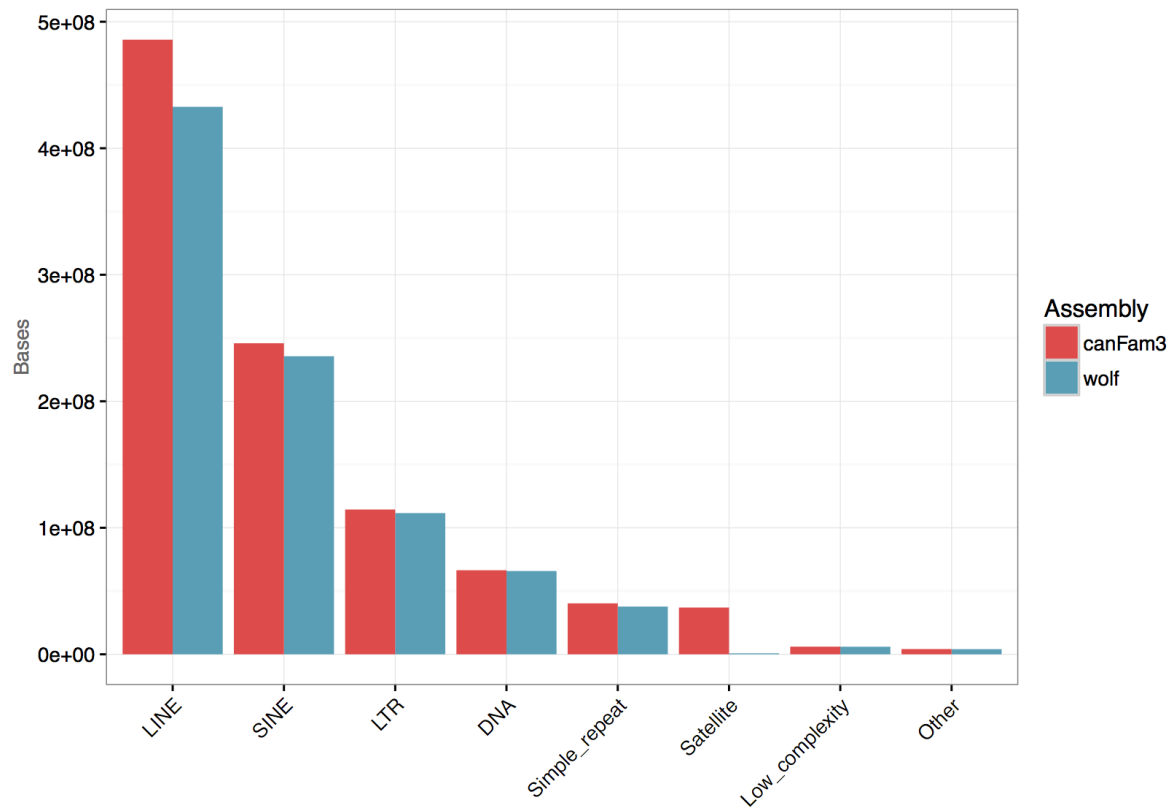

**Supplementary Figure 2:** Distribution of repeat elements. Total amount of bases in different repeat classes across the two reference genomes.

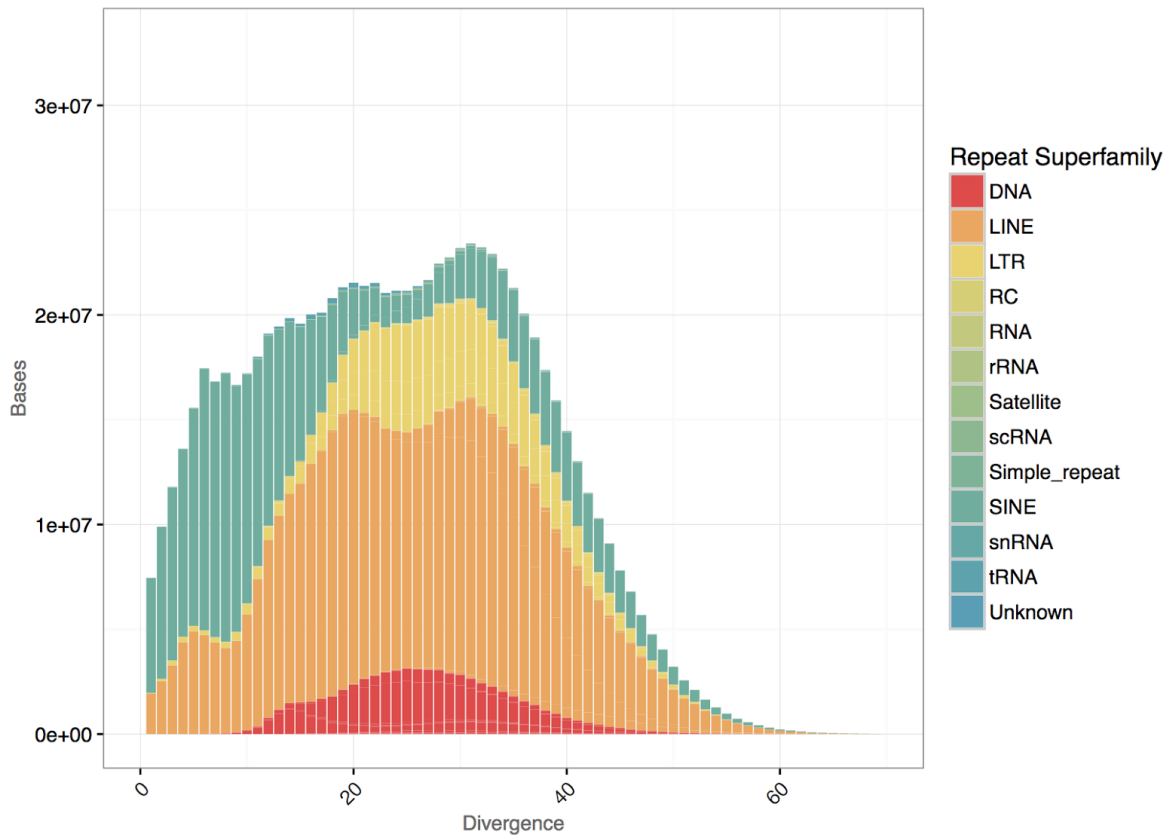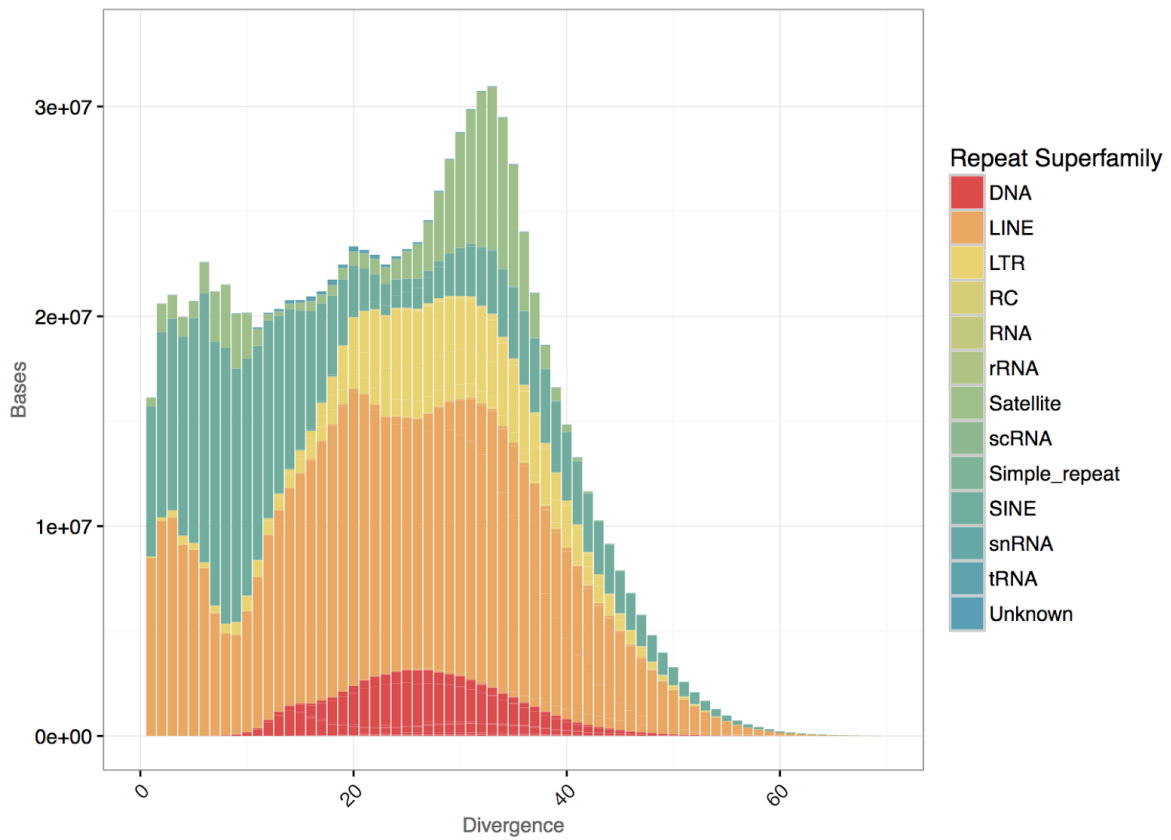

**Supplementary Figure 3:** Comparison of the divergence of the different repeat elements from their consensus sequence. The top panel shows the total number of bases against the divergence from the consensus sequence in each repeat family when using the de novo wolf

reference genome for alignment. The bottom panel shows the same figures when using the boxer reference genome.

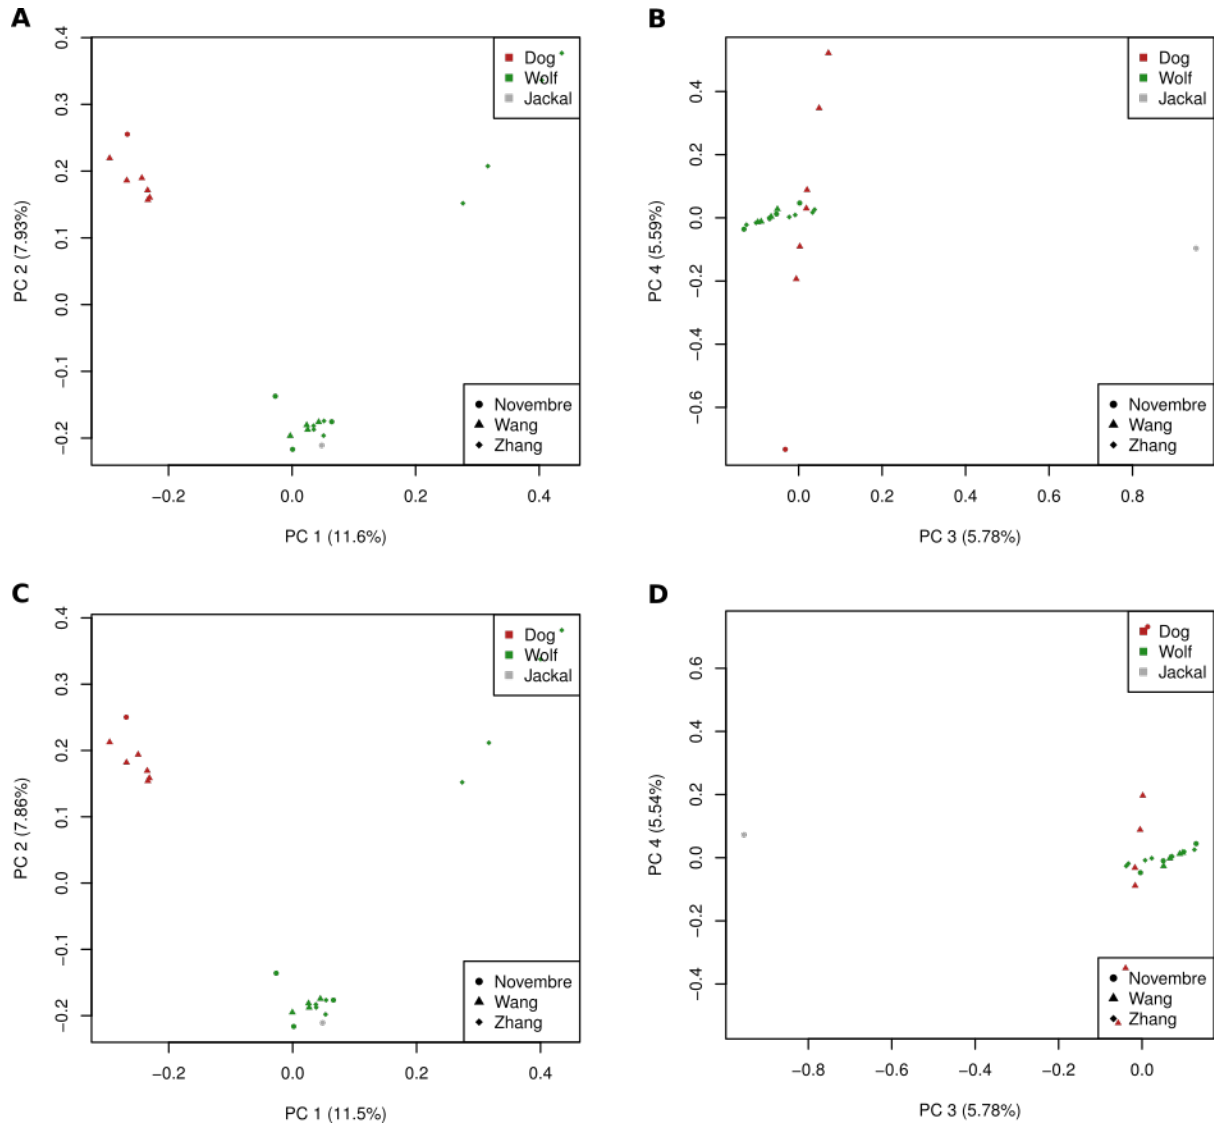

**Supplementary Figure 4: Principal Components Analysis (PCA).** Panels A and B show the first four principal components of the genotypes when using the de novo wolf reference assembly. For making these PCA plots, we used a missingness cutoff of 0.9 and a minor allele frequency cutoff of 0.2. Panels C and D show the first four principal components of the genotypes when using the boxer reference genome while using the same filtering thresholds.

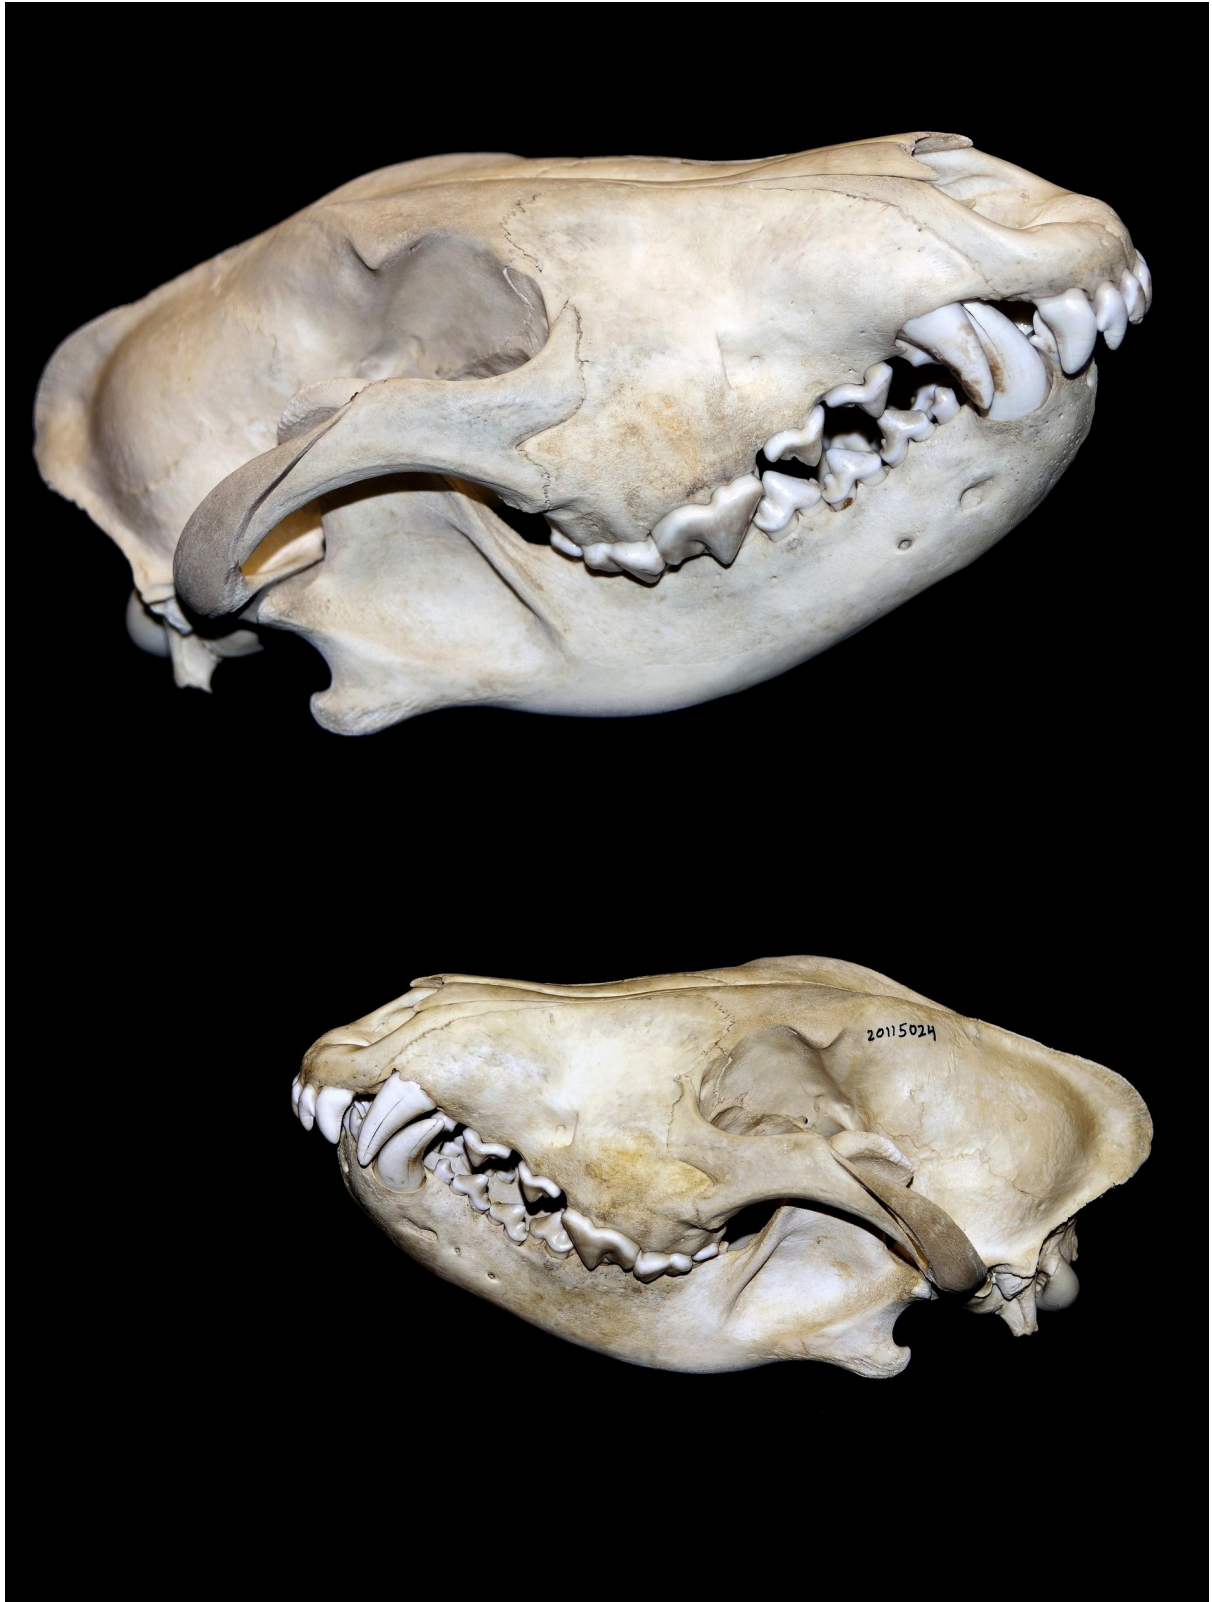

**Supplementary Figure 5:** Picture of the skull of the Swedish wolf sample used for reference genome assembly. Photo: J. Räikkönen

## SUPPLEMENTARY TABLES

| Study/<br>Sample              | Aligned to the de novo wolf genome<br>assembly |                | Aligned to the boxer dog reference<br>genome |                |
|-------------------------------|------------------------------------------------|----------------|----------------------------------------------|----------------|
|                               | Coverage                                       | Heterozygosity | Coverage                                     | Heterozygosity |
| <b><i>Freedman et al.</i></b> |                                                |                |                                              |                |
| Golden Jackal                 | 21.996                                         | 0.00128457     | <b>22.006</b>                                | 0.000773261    |
| Chinese Wolf                  | <b>25.477</b>                                  | 0.00119212     | 25.271                                       | 0.00126921     |
| Croatian Wolf                 | <b>24.315</b>                                  | 0.00110828     | 24.157                                       | 0.000768382    |
| Israeli Wolf                  | <b>20.620</b>                                  | 0.00135151     | 20.481                                       | 0.000883584    |
| Dingo                         | 25.440                                         | 0.000506813    | <b>25.688</b>                                | 0.000338711    |
| <b><i>Wang et al.</i></b>     |                                                |                |                                              |                |
| Gray Wolf 1                   | <b>9.980</b>                                   | 0.00124735     | 9.932                                        | 0.0014045      |
| Gray Wolf 2                   | <b>8.090</b>                                   | 0.00105924     | 8.047                                        | 0.00119143     |
| Gray Wolf 3                   | <b>10.199</b>                                  | 0.00114766     | 10.169                                       | 0.00132054     |
| Gray Wolf 4                   | <b>8.191</b>                                   | 0.000880498    | 8.163                                        | 0.000994077    |
| Belgian Malinois              | 9.376                                          | 0.000714592    | <b>9.419</b>                                 | 0.000795193    |
| German Shepherd               | 8.582                                          | 0.000502106    | <b>8.604</b>                                 | 0.000556685    |
| Chinese Indigenous Dog 1      | 11.021                                         | 0.00105524     | 11.020                                       | 0.00117199     |
| Chinese Indigenous Dog 2      | 9.917                                          | 0.000735783    | <b>10.484</b>                                | 0.000829596    |
| Chinese Indigenous Dog 3      | 8.244                                          | 0.000867376    | <b>8.25</b>                                  | 0.000965169    |
| Tibetan Mastiff               | 9.478                                          | 0.000928       | <b>9.516</b>                                 | 0.00104257     |
| <b><i>Zhang et al.</i></b>    |                                                |                |                                              |                |
| Gray Wolf - C6                | <b>23.133</b>                                  | 0.00130461     | 22.996                                       | 0.00145654     |
| Gray Wolf - C7                | <b>20.131</b>                                  | 0.00139529     | 20.022                                       | 0.00155539     |
| Gray Wolf - C9A               | <b>23.905</b>                                  | 0.000708302    | 23.767                                       | 0.000770862    |
| Gray Wolf - C11               | <b>23.705</b>                                  | 0.00131756     | 23.569                                       | 0.00146154     |
| Gray Wolf - C16               | <b>24.094</b>                                  | 0.00121058     | 23.952                                       | 0.00133022     |
| Gray Wolf - C24               | <b>21.797</b>                                  | 0.00151702     | 21.638                                       | 0.00169685     |
| Gray Wolf - C30               | <b>24.387</b>                                  | 0.00153458     | 24.213                                       | 0.00171929     |
| Gray Wolf - C32               | <b>23.068</b>                                  | 0.000834478    | 22.941                                       | 0.000919653    |

**Supplementary Table 1:** Coverage and heterozygosity estimates. The coverage and heterozygosity are shown for each sample included in the study. For each animal, the higher estimate of coverage are bolded.
